# Supplementary material for: Associations between pro-inflammatory cytokines and fatigue in pregnant women
Source: PeerJ. 2022 Sep 28;10:e13965. doi: 10.7717/peerj.13965 (PMC9526404; doi:10.7717/peerj.13965)
Supplement: Dataset S1 — Four pro-inflammatory cytokines, prenatal fatigue and covariates of this study. [file peerj-10-13965-s001.xlsx]

## Sheet: data base
Participants Number	Dependent variable		Independent variables				Covariates
	PROMIS-F-8a Scores	Fatigue Groups （1=Fatigue Group; 0=Non-fatigue Group)	TNFα	IL1β	IL6	IL8	Age	Prenatal BMI	Hometown (1=Shanghai; 0=Other places)	Employment (1=Yes; 0=No)	Educational level (1=<college; 2=college or bachelor; 3=>bachelor)	Parity (1=Primipara； 0=Multipara）	Gestational weeks	PQSI Scores	EPDS Scores
1	61.5743	1	101.83	68.73	189.66	977.79	18	19	1	0	1	0	35.4286	9	2
2	65.0589	1	62.33	2.36	88.27	1755.27	18	20	1	0	1	0	34.2857	6	4
3	49.3782	0	20.57	1.36	14.82	371.77	27	23.6713	1	1	1	1	36.4286	15	12
4	38.9244	0	17.75	1.53	136.13	480.65	33	24.974	1	1	1	0	32.1429	5	6
5	73.7704	1	176.6	188.77	323.74	1085.2	28	26.3465	1	1	1	1	36.4286	9	8
6	68.5435	1	183.2	112.64	1178.86	1919.64	29	17.4191	1	1	1	1	35	11	17
7	44.1513	0	26.32	10.66	138.34	349.55	36	30.4705	1	1	1	1	34.7143	6	3
8	54.6051	1	41.05	88.46	48.19	727.36	24	19.3359	1	1	1	1	34	8	4
9	65.0589	1	148.06	4.56	336.46	411.81	32	22.9421	1	1	1	1	37.1429	10	16
10	42.409	0	36.99	34.03	88.49	760.06	32	19.9481	1	1	1	1	33.8571	3	4
11	35.4398	0	64.58	99.8	90.32	886.37	36	22.0604	1	0	1	0	33.5714	1	1
12	35.4398	0	38.76	10.11	26.86	308.4	33	22.0317	1	1	1	1	34.1429	5	0
13	54.6051	1	106.72	50.57	153.4	1268.22	35	19.9219	1	1	1	1	36.4286	11	7
14	35.4398	0	25.41	45.56	143.54	1645.18	38	20.4467	1	1	1	0	33.1429	4	0
15	52.8628	1	104.79	78.59	134.39	1526.7	34	24.4444	1	1	1	1	35	7	2
16	49.3782	0	89.59	2.01	31.26	635.24	28	25.3902	1	0	1	1	34.2857	5	3
17	58.0897	1	188.75	13.61	119.17	1064.63	28	18.75	0	1	1	1	36.2857	6	7
18	49.3782	0	22.93	5.31	126.95	466.24	27	18.0697	0	1	1	1	34.1429	5	6
19	72.0281	1	37.72	6.66	276.03	516.41	35	22.4609	0	0	1	0	38	7	7
20	54.6051	1	17.75	43.47	164.42	438.59	33	23.3091	0	0	1	1	34.8571	7	6
21	38.9244	0	65.6	8.8	93.12	541.99	31	31.6263	0	1	1	1	36.8571	2	1
22	40.6667	0	52.19	10.9	191.48	1038.18	31	24.0346	0	1	1	1	35.2857	6	1
23	35.4398	0	93.2	18.38	89.26	573.39	32	19.9792	0	0	1	1	37.1429	1	3
24	47.6359	0	14.42	6.42	3.74	28.58	23	19.0039	0	1	1	1	34.7143	6	3
25	47.6359	0	82.47	169.06	228.94	959.33	28	19.1953	0	0	1	1	33.1429	4	5
26	58.0897	1	62.57	11.34	38.93	585.44	33	22.6003	0	1	1	1	36.8571	7	6
27	51.1205	1	68.33	13.79	142.58	499.63	35	19.9792	0	1	1	0	33.1429	14	10
28	59.832	1	99.23	86.55	424.41	522.33	35	19.9792	0	1	1	0	34.5714	13	10
29	65.0589	1	13.75	5.25	21.09	53.82	26	17.5781	0	0	1	1	35	8	9
30	70.2858	1	73.05	68.5	111.98	909.2	34	20.7967	0	1	1	0	34.5714	14	10
31	51.1205	1	64.98	2.2	55.29	918.99	24	31.2213	0	1	1	1	35.7143	6	7
32	49.3782	0	30.15	44.85	104.11	822.98	28	22.9421	0	1	1	1	34.4286	8	9
33	35.4398	0	27.58	61.48	148.14	1020.19	34	23.8754	0	1	1	0	32.5714	3	0
34	63.3166	1	46.56	9.21	36.78	700.38	44	22.3081	0	1	1	1	35	10	7
35	58.0897	1	45.62	47.87	100.33	962.64	24	23.7332	0	0	1	1	36.5714	9	4
36	44.1513	0	52.75	24.96	79.26	757.88	24	23.7332	0	0	1	1	37.2857	13	5
37	37.1821	0	31.63	29.27	32.36	331.69	30	19.1111	0	1	1	1	34.2857	3	1
38	59.832	1	47.37	4.95	19.99	1035.04	33	19.8141	0	1	1	1	34.5714	10	7
39	45.8936	0	44.81	6.05	121.84	519.68	32	22.6562	0	1	1	1	35	6	2
40	47.6359	0	95.14	100.28	165.2	1947.61	31	22.1893	0	1	1	1	36.7143	7	5
41	45.8936	0	44.69	9.52	213.83	538.39	22	26.3101	0	0	1	1	37.5714	4	3
42	49.3782	1	80.42	36.77	335.58	1994.69	38	24.4646	0	1	1	0	37.1429	7	6
43	84.2242	1	163.28	29.49	357.07	1921.74	38	24.4646	0	1	1	0	37.4286	3	9
44	56.3474	1	69.8	23.01	213.37	1984.53	35	22.0604	0	1	1	0	37.4286	6	7
45	54.6051	1	46.64	3.31	314.69	1693.37	31	18.4911	0	1	1	0	35.8571	11	3
46	40.6667	0	57.98	16.19	241.57	1847.81	32	20.0288	0	1	1	0	34.5714	1	2
47	44.1513	0	23	7.9	67.93	816.78	43	23.1399	0	1	1	1	35.4286	7	3
48	63.3166	1	31.36	24.67	38.56	630	24	20.7031	0	1	1	0	36.8571	9	8
49	44.1513	0	68.84	5.49	83.4	544.56	25	23.03	0	1	1	1	34.5714	4	0
50	47.6359	0	35.53	36.51	59.92	1090.98	24	22.0317	0	0	1	1	38	9	10
51	70.2858	1	137.36	20.76	324.7	1674.27	34	18.0662	0	1	1	1	38.7143	11	11
52	51.1205	1	19.25	2.88	44.38	474.45	18	16.5607	0	0	1	1	34.1429	7	8
53	45.8936	0	38.92	64.27	123.2	352.99	27	17.1875	0	1	1	1	37	7	4
54	68.5435	1	68.84	3.05	288.04	1922.87	30	18.3594	0	1	1	0	34.4286	6	6
55	54.6051	1	35.13	7.86	5.93	48.1	31	17.3134	0	1	1	0	35.2857	6	6
56	58.0897	1	25.72	60.6	162.56	999.19	27	21.5645	0	1	1	1	34	8	13
57	58.0897	1	16.99	5.28	2.1	206.64	30	19.7777	0	1	1	0	36.1429	6	8
58	51.1205	1	234.87	43.54	277.99	550.47	30	19.7777	0	1	1	0	35.1429	5	7
59	49.3782	0	30.72	2.03	89.91	508.84	28	22.4913	0	1	1	1	38	10	4
60	40.6667	0	58.66	4.9	0.38	170.52	23	21.6311	0	1	1	0	39.7143	5	4
61	40.6667	0	7.38	0.71	9.51	157.49	34	20.9644	0	1	1	0	36.5714	5	8
62	47.6359	0	40.45	61.98	238.17	555.42	34	20.9644	0	1	1	0	34.4286	8	7
63	68.5435	1	36.51	6.29	99.53	1350.83	28	27.6361	0	1	1	1	36.2857	17	7
64	35.4398	0	64.5	32.35	403.92	1968.46	35	20.8117	1	1	2	1	34.1429	1	6
65	45.8936	0	44.27	17.39	123.34	983.17	34	23.03	1	1	2	1	32.2857	2	1
66	44.1513	0	83.14	123.7	150.94	1004.21	26	18.0662	1	1	2	1	38.2857	6	5
67	38.9244	0	44.71	58.25	69.35	764.12	27	20.0288	1	1	2	1	36.1429	6	1
68	40.6667	0	51.66	37.26	166.37	571.82	35	20.5761	1	1	2	0	34.4286	5	0
69	45.8936	0	217.7	188.32	1133.56	1660.79	23	21.2953	1	1	2	1	35.5714	7	1
70	42.409	0	5.12	2.25	0.95	35.38	29	21.83	1	1	2	1	34.1429	4	2
71	37.1821	0	25.58	109	234.7	1018.31	30	19.3772	1	1	2	1	36.8571	5	0
72	51.1205	1	83.56	6.22	359.01	2295.11	33	30.4688	1	1	2	1	34.4286	9	5
73	45.8936	0	52.34	29.27	110.14	937.85	26	21.4844	1	1	2	1	34.2857	6	7
74	59.832	1	94.8	37.76	118.28	547.77	27	20.5693	1	1	2	0	37.1429	5	7
75	51.1205	1	33.25	10.66	98.29	673.57	28	22.4913	1	1	2	0	34.2857	10	9
76	51.1205	1	28.48	4.86	42.19	512.91	26	19.1406	1	1	2	1	34.1429	6	4
77	44.1513	0	28.67	14.19	24.87	679.99	25	19.2894	1	1	2	1	33.8571	6	8
78	35.4398	0	39.57	66.72	60.54	646.15	25	18.5078	1	1	2	1	35	3	0
79	58.0897	1	24.91	13.86	29.64	510.37	26	19.8413	1	1	2	1	35.1429	5	6
80	51.1205	1	22.17	1.36	80.67	399.85	26	21.6311	1	1	2	1	36.4286	5	6
81	63.3166	1	219.39	58.36	694.44	2102.91	26	21.6311	1	1	2	1	36.2857	13	5
82	42.409	0	62.81	9	118.67	1017.57	29	22.8374	1	1	2	1	38.2857	5	5
83	49.3782	0	34.58	13.16	78.51	1422.62	27	20.3727	1	1	2	1	35.7143	5	9
84	37.1821	0	23.02	1.98	66.3	470.32	29	19.0039	1	1	2	1	34.7143	8	2
85	73.7704	1	188.71	21.65	127.94	1631.89	30	21.4844	1	1	2	1	35.7143	11	12
86	52.8628	1	13.83	2.64	69.62	1800.96	31	18.7783	1	1	2	1	35.5714	6	5
87	42.409	0	69.96	14.17	14.33	300.98	30	22.6757	1	1	2	1	34.7143	4	0
88	49.3782	0	48.71	9.69	43.02	680.82	32	22.9591	1	1	2	1	36.5714	5	8
89	56.3474	1	27.17	8.7	206.55	515.42	33	22.4813	1	1	2	1	35.5714	8	7
90	45.8936	0	52.88	9.47	38.5	559.1	29	25.2174	1	1	2	1	34.1429	3	6
91	45.8936	0	23.56	24.94	13.96	566.39	29	17.1875	1	1	2	1	35.7143	2	4
92	47.6359	0	29.88	7.32	21.14	331.19	37	19.5312	1	1	2	0	35.8571	10	3
93	54.6051	1	101.17	36.97	226.74	1679.63	32	21.4844	1	1	2	0	34.5714	6	3
94	51.1205	1	33.25	8.98	55.16	557.79	32	21.2585	1	1	2	1	34.8571	10	7
95	49.3782	0	86.93	3.68	159.57	1053.15	33	19.9481	1	1	2	1	33.8571	4	0
96	44.1513	0	38.44	82.21	40.6	523.9	33	24.7221	1	1	2	1	35.5714	5	4
97	42.409	0	133.26	27.61	261.31	839.39	34	18.2899	1	1	2	1	34.1429	2	1
98	49.3782	0	12.13	5.8	10.7	94.99	34	20.4491	1	1	2	1	35.8571	7	0
99	42.409	0	11.9	1.99	8.98	31.49	37	25.6874	1	1	2	1	37.1429	4	3
100	47.6359	0	46.43	11.89	18.11	507.01	38	21.5645	1	1	2	1	37	14	6
101	44.1513	0	96.18	31.79	78.19	874.84	24	18.7328	1	1	2	1	33.8571	7	4
102	63.3166	1	65.7	35.3	300.2	2108.59	24	21.0772	1	0	2	1	38.4286	8	16
103	52.8628	1	210.22	26.84	392.14	1936.13	27	20.4382	1	1	2	1	32	6	0
104	35.4398	0	83.54	13.45	282.82	1790	29	21.9076	1	1	2	1	36.5714	8	0
105	68.5435	1	49.06	4.18	48.32	1382.11	33	20.4596	1	1	2	1	36	6	7
106	66.8012	1	76.56	153.73	174.15	1715.07	28	22.4913	1	1	2	1	37.7143	8	6
107	37.1821	0	41.58	11.68	129.76	988.93	31	21.9713	1	1	2	1	35.8571	5	2
108	42.409	0	48.17	6.6	222.23	473.23	25	16.0256	1	1	2	1	34.7143	3	0
109	37.1821	0	33.38	3.85	4.75	84.64	31	21.7738	1	1	2	1	34.5714	3	3
110	45.8936	0	15.49	1.24	58.12	415.94	29	24.3865	1	1	2	1	36.2857	7	2
111	38.9244	0	30.24	9.99	54.76	331.69	34	24.5089	1	1	2	0	34.1429	4	5
112	44.1513	0	72.46	19	369.93	1963.42	24	22.4103	1	1	2	1	35	5	0
113	45.8936	0	79.94	23.98	379.21	1749.89	24	22.4103	1	1	2	1	34	8	7
114	58.0897	1	91.31	141.77	558.21	556.11	28	18.7328	1	1	2	1	36.7143	6	11
115	63.3166	1	26.12	166.64	55.02	875.02	28	19.2336	1	1	2	1	34.1429	5	7
116	59.832	1	23.24	3.81	91.33	700.8	31	24.0205	1	1	2	1	36.1429	9	13
117	42.409	0	12.85	23.17	118.63	439.38	32	19.4674	1	1	2	1	35.5714	10	3
118	45.8936	0	11.25	10.04	63.72	284.02	28	22.0386	1	1	2	1	36	5	6
119	52.8628	1	67.77	25.47	353.65	528.69	31	29.4919	1	1	2	1	34.4286	5	5
120	78.9973	1	76.08	38.96	472.53	2006.71	32	20.3244	1	1	2	1	38	15	8
121	44.1513	0	34.19	27.05	37.38	669.29	35	22.3081	1	1	2	1	34.5714	6	3
122	72.0281	1	44.96	5.55	114.05	1108.11	32	20.9572	0	1	2	1	35.2857	8	13
123	56.3474	1	5.87	14.5	654.56	2249.95	30	21.9261	0	1	2	1	35.7143	11	6
124	63.3166	1	32.65	17.71	105.66	1229.89	28	19.3337	0	1	2	1	36.1429	9	5
125	66.8012	1	41.86	15.94	396.84	521.78	37	19.5965	0	1	2	0	34.7143	9	9
126	44.1513	0	124.85	178.98	275.36	548.69	27	19.1406	0	1	2	1	35.5714	8	9
127	45.8936	0	24.24	16.73	30.31	376.71	25	20.9572	0	1	2	1	34.1429	8	3
128	42.409	0	33.76	32.4	72.92	400.87	28	19.7239	0	1	2	1	34.7143	5	3
129	47.6359	0	53.15	200.98	216.86	922.56	30	20.4382	0	1	2	1	36	3	7
130	49.3782	0	40.61	64.8	187.28	896.76	35	24.6548	0	1	2	0	35.4286	2	3
131	51.1205	1	10.68	1.83	29.01	435.83	28	25.7812	0	1	2	1	34	8	7
132	35.4398	0	35.4	33.92	70.7	859.52	29	18.2899	0	1	2	1	35.8571	8	3
133	45.8936	0	54.95	2.93	50.68	467.58	30	17.7163	0	1	2	1	35	7	0
134	52.8628	1	16.71	109.4	208.14	1100.96	30	24.1672	0	1	2	1	35	8	5
135	47.6359	0	9.27	2.46	87.09	489.33	32	24.7676	0	1	2	1	35.5714	6	3
136	38.9244	0	47.9	12.65	135.26	1013.16	25	23.3355	0	1	2	1	36.2857	6	3
137	47.6359	0	86.93	3.74	310.56	1490.88	25	23.3355	0	1	2	1	37.8571	10	3
138	56.3474	1	38.68	19.02	214.95	1781.01	25	21.6041	0	1	2	1	34	10	6
139	44.1513	0	99	43.6	332.35	1931.65	25	20.9042	0	1	2	1	35.2857	7	5
140	66.8012	1	13.83	11.15	37.82	768.32	26	20.3074	0	1	2	1	36.5714	7	13
141	49.3782	0	89.59	17.2	45.93	638.34	27	23.1111	0	1	2	1	36.5714	4	7
142	65.0589	1	87.9	15.4	444.86	2148.14	27	20.1348	0	1	2	1	35.2857	11	11
143	63.3166	1	24.1	86.07	638.08	732.38	26	19.8347	0	1	2	1	36.2857	11	9
144	45.8936	0	31.44	10.61	31.99	591.76	27	19.2894	0	1	2	1	35	5	8
145	35.4398	0	70.29	15.01	287.92	1952.89	28	20.9042	0	1	2	1	38.2857	5	3
146	70.2858	1	50.86	39.66	58.71	1258.48	27	22.6562	0	1	2	1	34.2857	12	9
147	49.3782	0	15.76	24.79	263.98	1079.09	29	21.2585	0	1	2	1	34.4286	4	1
148	54.6051	1	29.9	66.41	136.38	480.5	29	20.83	0	1	2	1	34.5714	7	10
149	51.1205	1	11.34	12.21	0.84	157.95	30	23.5237	0	1	2	1	35.7143	4	5
150	82.4819	1	506.24	98.37	1045.27	1973.45	30	19.8141	0	1	2	1	38.4286	10	8
151	40.6667	0	72.7	32.32	178.3	1031.67	31	18.5901	0	1	2	1	38.1429	5	3
152	66.8012	1	33.11	27.45	40.49	702.21	31	22.0604	0	1	2	1	36.2857	10	16
153	51.1205	1	25.09	47.05	31.9	368.1	30	18.3594	0	1	2	1	35.1429	5	4
154	49.3782	0	45.92	2.3	138.14	1709.54	30	23.1206	0	1	2	1	35	7	4
155	63.3166	1	69.08	30.48	241.45	1855.72	30	23.2816	0	1	2	1	34.8571	11	9
156	45.8936	0	50.02	6.23	120.79	1581.52	31	21.7778	0	1	2	1	36.1429	5	0
157	63.3166	1	14.45	1.49	38.54	242.98	31	19.5312	0	1	2	1	37	12	10
158	59.832	1	118.78	56.41	46.81	1211.84	33	18.9036	0	1	2	1	35.2857	4	5
159	51.1205	1	17.28	8.49	138.55	487.7	28	24.7676	0	1	2	1	34.5714	9	9
160	91.1934	1	89.86	14.84	108.7	1949.9	32	28.3447	0	1	2	0	34	6	2
161	58.0897	1	93.21	5.39	246.17	1596.16	27	16.263	0	1	2	1	35.2857	9	6
162	63.3166	1	61.35	8.95	54.1	489.59	28	24.266	0	1	2	1	34	11	12
163	66.8012	1	151.11	12.48	36.05	932.64	31	19.8347	0	1	2	1	35.4286	14	2
164	56.3474	1	49.3	10.7	70.35	1452.51	34	20.202	0	1	2	0	37.1429	12	3
165	40.6667	0	36.75	15.17	99.38	988.93	27	22.6757	0	1	2	1	36.4286	7	2
166	51.1205	1	83.8	5.13	120.13	672.16	34	19.8347	0	1	2	0	37.5714	10	9
167	78.9973	1	52.34	11.32	86.62	1058.13	37	17.9688	0	1	2	0	35.8571	10	5
168	66.8012	1	50.5	22.1	88.68	1596.23	27	18.3655	0	1	2	1	38	13	6
169	44.1513	0	32.17	8.31	63.5	534.95	29	18.0662	0	1	2	1	34.5714	1	2
170	40.6667	0	74.63	7.74	199.99	1673.52	32	19.2425	0	1	2	1	35	5	0
171	42.409	0	23.16	36.77	7.98	277.35	33	18.4425	0	1	2	1	34.2857	6	3
172	47.6359	0	97.55	6.12	227.03	843.15	31	16.937	0	1	2	1	35.5714	7	4
173	49.3782	0	12.54	7.93	21.26	218.18	35	20.6575	0	1	2	1	34	8	8
174	51.1205	1	14.82	7.44	30.94	524.56	37	21.9671	0	1	2	1	36.7143	6	6
175	49.3782	0	36.27	5.81	374.01	1491.07	31	20.8209	0	1	2	0	35.5714	10	7
176	59.832	1	94.84	20.79	6.83	198.73	36	19.3625	0	1	2	1	35.1429	12	3
177	45.8936	0	63.1	12.16	124.22	1354.59	25	21.0938	0	1	2	1	36.1429	5	8
178	42.409	0	28.01	1.61	154.06	437.79	29	19.3625	0	1	2	1	34.1429	7	3
179	37.1821	0	47.61	35.97	305.06	1079	29	20.0288	0	1	2	1	34.4286	4	1
180	44.1513	0	11.73	5.68	8.21	29.19	31	20.3125	0	1	2	1	37.4286	6	4
181	58.0897	1	55.57	105.94	370.94	2004.98	28	21.7181	0	1	2	1	35.7143	3	3
182	61.5743	1	114.2	8.43	9.95	224	30	21.3382	0	1	2	1	35.2857	7	2
183	63.3166	1	24.93	12.29	300.55	1429.16	30	21.7738	0	1	2	1	36.8571	6	9
184	47.6359	0	83.61	10.98	92.24	395.59	31	23.5883	0	1	2	1	34.8571	4	1
185	66.8012	1	36.07	8.55	63.74	912.65	31	19.2277	0	1	2	1	34.2857	4	4
186	63.3166	1	7.1	9.77	84.84	344.84	32	19.1953	0	1	2	1	35.2857	10	6
187	63.3166	1	39.65	0.49	56.76	1776.7	33	19.2234	0	1	2	1	36.5714	3	5
188	68.5435	1	119.26	31.28	278.91	1754.18	33	19.2234	0	1	2	1	35.2857	9	8
189	73.7704	1	40.61	23.9	5.9	425.73	27	24.2188	0	1	2	1	35.4286	11	6
190	65.0589	1	24.8	5.15	163.08	374.88	27	19.0677	0	1	2	1	32.5714	7	6
191	49.3782	0	28.67	47.44	91.42	630.74	27	17.7778	0	1	2	1	35.8571	4	6
192	58.0897	1	47.1	10.21	119.5	1107.03	27	19.0677	0	1	2	1	36.4286	5	7
193	49.3782	0	15.67	16.01	77.25	478.08	35	20.3954	0	1	2	0	37.4286	3	4
194	40.6667	0	46.89	111.01	407.33	1807.01	39	26.5338	0	1	2	1	36.7143	4	4
195	47.6359	0	74.08	22.53	237.9	543.88	32	22.5466	0	1	2	1	35.5714	5	6
196	42.409	0	50.24	9.53	233.36	1896.92	32	21.1553	0	1	2	1	34	2	1
197	61.5743	1	85.97	56.51	357.76	2023.46	37	22.2063	0	1	2	1	34.4286	8	9
198	51.1205	1	20.29	98.9	238.44	1062.98	25	18.8189	0	1	2	1	35.1429	7	11
199	51.1205	1	45.48	7.44	19.18	780.15	30	20.5442	0	1	2	1	36	6	1
200	72.0281	1	142.04	67.12	191.66	934.22	27	22.6003	0	1	2	1	36.5714	9	9
201	51.1205	1	5.31	0.73	3.66	51.61	28	21.2279	0	1	2	1	34.2857	8	2
202	49.3782	0	45.2	29.84	621.8	1858.46	28	21.6552	0	1	2	1	37.5714	5	5
203	35.4398	0	33.52	45.79	375.18	1075.81	32	20.9042	0	1	2	1	34.7143	2	2
204	38.9244	0	58.22	57.35	419.36	1825.51	34	20.202	0	1	2	0	34.5714	2	6
205	51.1205	1	69.56	19.88	82.07	1409.93	38	24.0346	0	1	2	0	36.4286	10	4
206	44.1513	0	24.37	11.23	44.19	401.46	29	18.3594	0	1	2	1	36.7143	6	7
207	45.8936	0	26.39	41.18	19.77	331.69	30	21.83	0	0	2	1	35.5714	12	6
208	63.3166	1	45.48	9.85	189.9	641.44	30	24.2188	0	1	2	1	35.5714	7	9
209	35.4398	0	58.66	104.99	312.54	1113.05	38	17.9282	0	1	2	0	33.8571	2	6
210	85.9665	1	137.84	58.42	490.74	1890.97	30	18.026	0	1	2	1	38	13	10
211	63.3166	1	132.53	28.34	101.37	1519.29	31	20.3125	0	1	2	1	35.1429	15	12
212	58.0897	1	35.17	40.26	350.73	506.4	33	30.4834	0	1	2	1	33.8571	5	7
213	44.1513	0	26.93	10.61	21.1	327.65	29	22.4766	0	1	2	1	35.4286	2	5
214	59.832	1	7.01	2.76	62.03	396.86	38	22.2656	1	1	3	0	34.8571	5	8
215	45.8936	0	15.04	1.21	94.92	549.49	34	23.4375	1	1	3	0	37.2857	2	6
216	52.8628	1	16.49	36.53	47.98	1003.77	32	20.3223	1	1	3	0	35.7143	8	3
217	56.3474	1	74.63	54.33	413.93	1866	36	16.3593	1	0	3	0	37.2857	8	7
218	52.8628	1	22.52	3.45	288.61	1898.57	33	27.4077	1	1	3	0	34.8571	7	5
219	45.8936	0	25.94	18.16	84.5	505.53	30	25.7276	1	1	3	1	34.4286	11	3
220	75.5127	1	241.15	170.46	217.58	2082.7	31	20.3223	1	1	3	1	35.5714	6	13
221	51.1205	1	166.47	51.68	553.88	405.55	34	23.8754	1	1	3	0	38.2857	14	10
222	49.3782	0	33.37	6.44	274.57	1878.37	31	21.7193	1	1	3	1	36.5714	6	3
223	59.832	1	35.93	14.52	177.71	501.5	33	19.1953	0	1	3	1	35	14	9
224	49.3782	0	14.07	11.52	125.49	632.18	37	21.83	0	1	3	0	35.7143	4	8
225	45.8936	1	97.07	46.63	582.08	2185.74	32	18.0662	0	1	3	1	37.1429	9	8
226	47.6359	0	32.35	7.53	48.81	493.53	28	18.6453	0	1	3	1	34.5714	6	2
227	59.832	1	41.67	17.76	282.19	526.24	27	21.875	0	1	3	1	36.4286	11	11
228	44.1513	0	7.67	4.18	45.63	340.01	30	20.7031	0	1	3	1	35.7143	4	1
229	44.1513	0	16.44	156.45	51.5	590.01	31	23.5556	0	1	3	1	34.7143	7	4
230	56.3474	1	34.86	6.51	3.39	3.38	39	29.2969	0	1	3	1	34.5714	7	4
231	49.3782	0	47.9	19.24	237.18	966.97	25	22.4813	0	1	3	1	36.5714	4	4
232	37.1821	0	52.19	5.92	34.07	403.55	26	20.0777	0	1	3	1	36	9	3
233	35.4398	0	35.55	31.03	248.03	1544.52	28	22.4996	0	1	3	1	38	7	8
234	59.832	1	121.6	15.76	117.58	748.62	27	19.6752	0	1	3	1	35.1429	6	4
235	45.8936	0	48.58	20.36	113.42	881.31	29	20.0796	0	1	3	1	36.5714	5	3
236	63.3166	1	94.9	8.9	232.02	528.76	29	18.7328	0	1	3	1	36.4286	9	12
237	45.8936	0	55.97	8.88	58.55	807.65	29	19.1406	0	1	3	1	34.5714	4	2
238	49.3782	1	94.65	16.92	456.9	2028.07	29	18.7783	0	1	3	1	36.1429	10	0
239	44.1513	0	53.4	8.93	158.22	1950.27	30	22.4913	0	1	3	1	35.7143	7	4
240	42.409	0	43.74	9.24	68.64	632.18	31	20.6728	0	1	3	1	38.7143	8	5
241	47.6359	0	52.48	13.62	92.3	924.27	30	19.1953	0	1	3	1	38.5714	9	4
242	37.1821	0	0.3	6.94	8.85	277.35	32	21.1203	0	1	3	1	34.8571	9	4
243	44.1513	0	12.47	35.46	170.81	523.3	23	17.1875	0	1	3	1	34.8571	4	6
244	59.832	1	65.46	142.43	192.94	1215.75	30	20.8325	0	1	3	1	34	4	9
245	44.1513	0	22.08	11.18	75.13	444.84	28	19.0677	0	1	3	1	35	12	9
246	47.6359	0	34.21	30.87	270.85	374.83	30	18.5901	0	1	3	1	34.5714	2	0
247	56.3474	1	22.83	1.83	152.64	455.55	34	19.5556	0	1	3	0	34.1429	6	2
248	49.3782	0	89.86	171.79	223.66	946.88	32	24.0882	0	1	3	1	36.1429	3	4
249	45.8936	0	18.45	8.1	25.88	287.43	36	19.0274	0	1	3	0	34.4286	4	2
250	47.6359	0	23.03	4.68	4.24	4.22	35	20.6667	0	1	3	1	34	5	3
251	49.3782	0	29.62	95.62	162.86	886.28	34	19.052	0	1	3	1	36.1429	10	9
252	42.409	0	46.89	26.6	150.36	1671.96	33	20.3125	0	1	3	1	36	2	7
253	61.5743	1	88.86	181.7	130.54	1170.38	26	21.5139	0	1	3	0	36.5714	6	8
254	35.4398	0	42.06	14.3	22.38	467.58	27	20.9572	0	1	3	1	33.7143	7	4
255	59.832	1	61.12	124.19	435.46	1859.77	29	19.9432	0	1	3	1	36.5714	11	11
256	51.1205	1	63.05	1.25	80.15	1219.83	31	19.1953	0	1	3	1	34.7143	7	6
257	49.3782	0	25.85	8.29	19.74	277.35	29	25.5593	0	1	3	1	36.2857	7	7
258	56.3474	1	7.8	5.72	92.99	1269.94	28	26.5731	0	1	3	1	35.4286	8	10
259	59.832	1	0.79	1.08	14.46	35.43	27	18.75	0	1	3	1	34.7143	10	13
260	37.1821	0	56.93	23.02	383.32	514.56	28	18.8444	0	1	3	1	35.2857	3	0
261	40.6667	0	22.49	100.25	30.36	309.88	32	18.5901	0	1	3	1	33.7143	5	1
262	45.8936	0	85.97	31.58	498.17	1822.77	30	18.7783	0	1	3	1	32.2857	8	9
263	59.832	1	163.28	1.58	166.37	287.43	27	18.5901	0	1	3	1	37.4286	11	8
264	35.4398	0	51.54	13.32	45.53	443.53	28	22.5827	0	1	3	1	36.4286	2	4
265	58.0897	1	50.46	185.54	329.02	1202.16	29	24.3824	0	1	3	1	38.2857	12	5
266	63.3166	1	18.32	4.09	4.16	73.86	32	23.7332	0	1	3	1	34.8571	6	6
267	49.3782	0	92	12.91	277.99	1639.38	27	19.5312	0	1	3	1	37.5714	8	8
268	49.3782	0	39.3	9.02	37.22	394.54	28	20.6946	0	1	3	1	34.8571	6	11
269	77.255	1	271.01	113.48	204.46	948.15	32	23.4375	0	1	3	1	34.1429	14	9
270	63.3166	1	49.78	14.19	72.43	1477.06	30	19.5312	0	1	3	1	35.2857	8	0
271	63.3166	1	108.69	152.44	362.62	1199.11	30	19.7777	0	1	3	1	37.7143	5	10
